# Supplementary material
Source: PubMed Central journal article supplement (PMC7346970)

1A

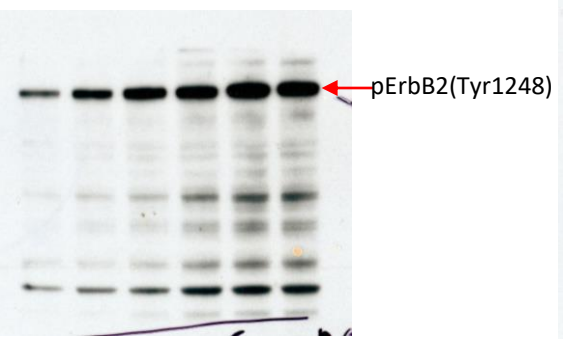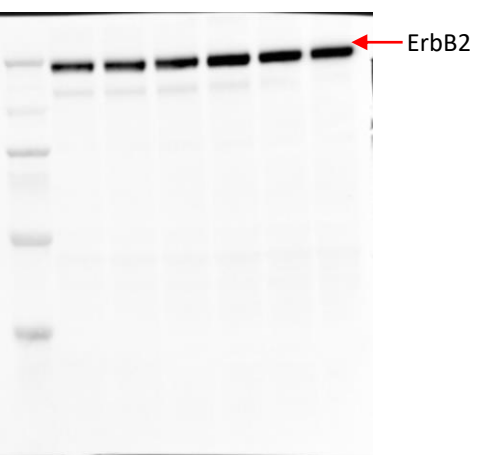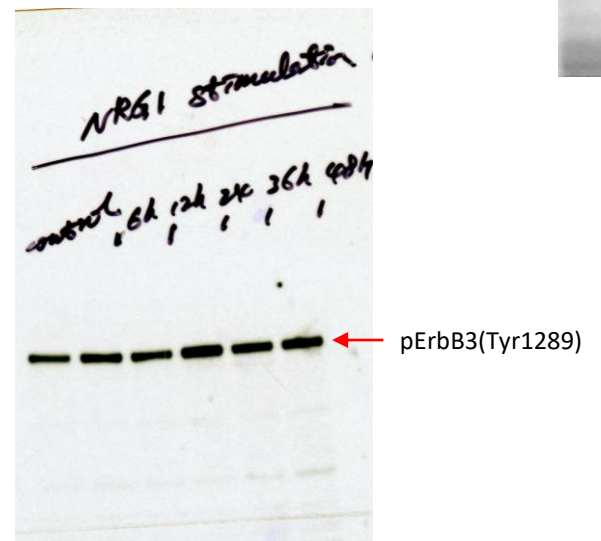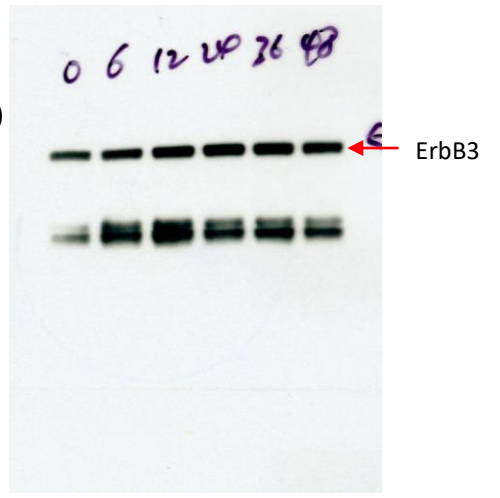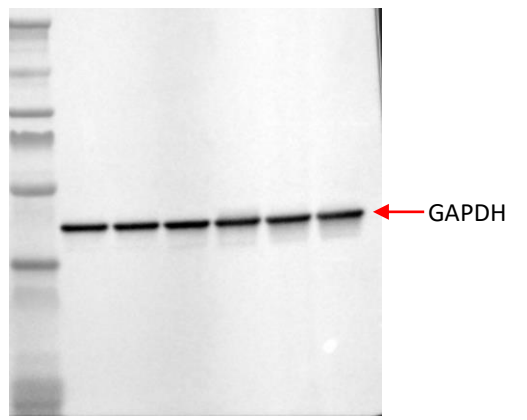

Fig.1

1B

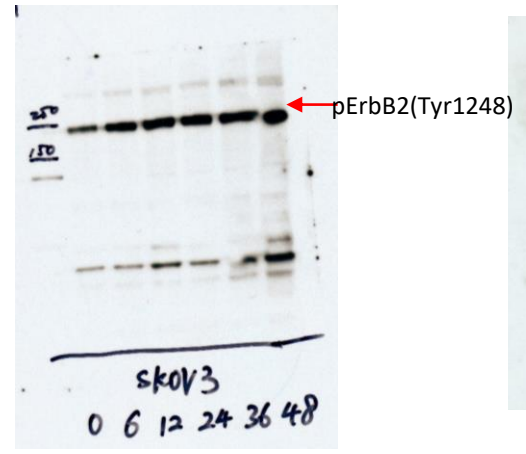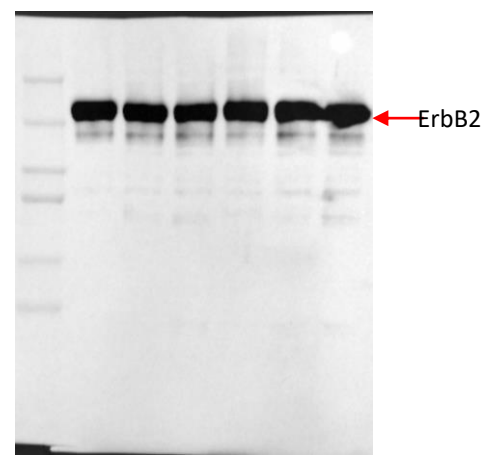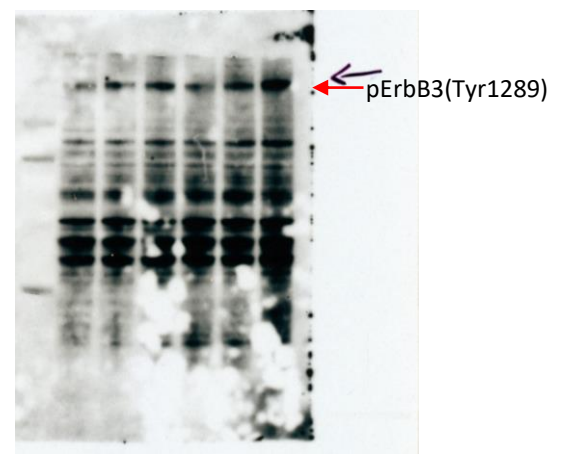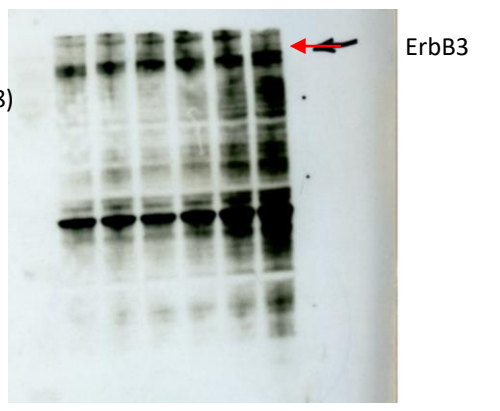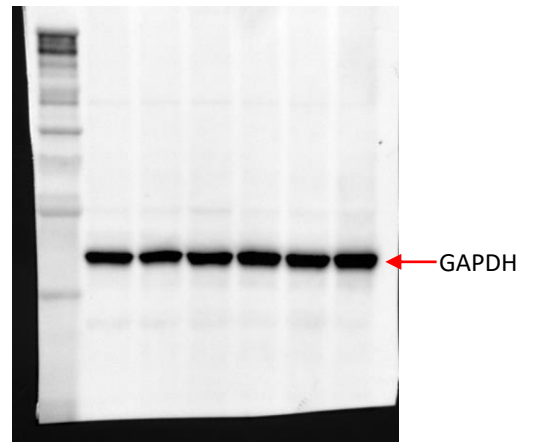

1C

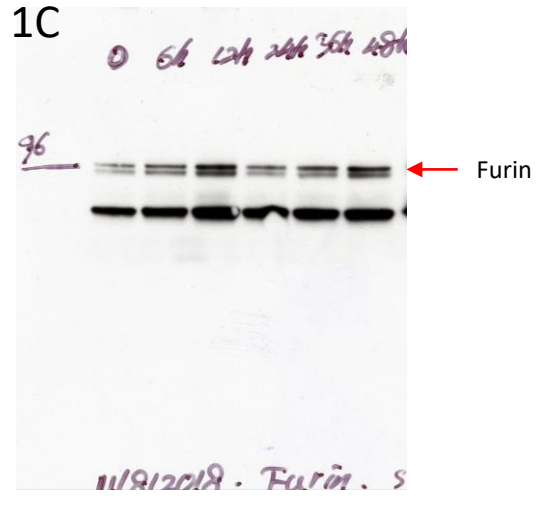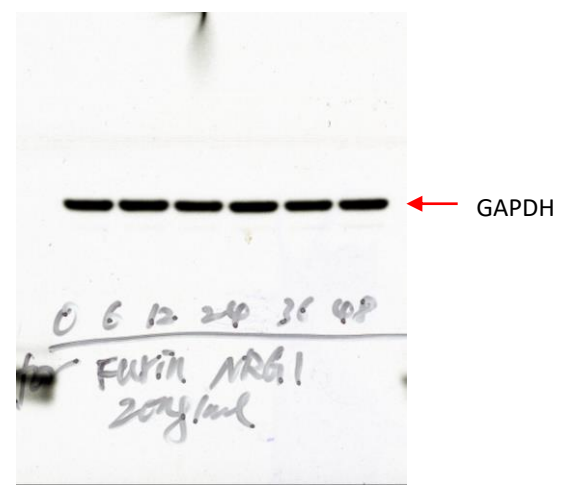

1D

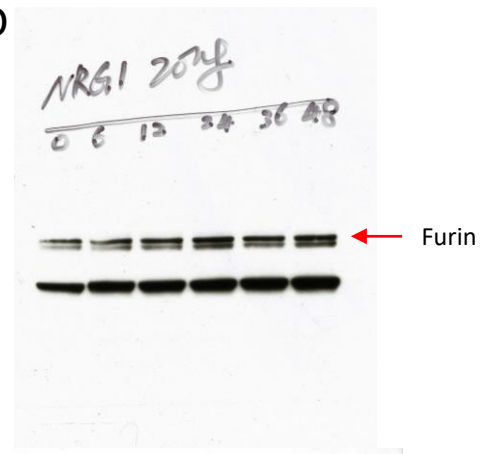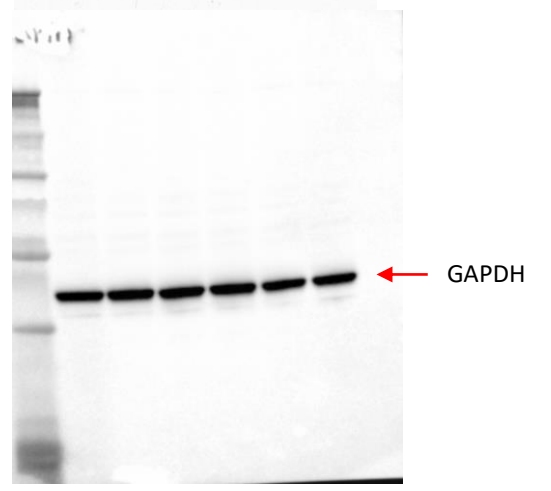

1E

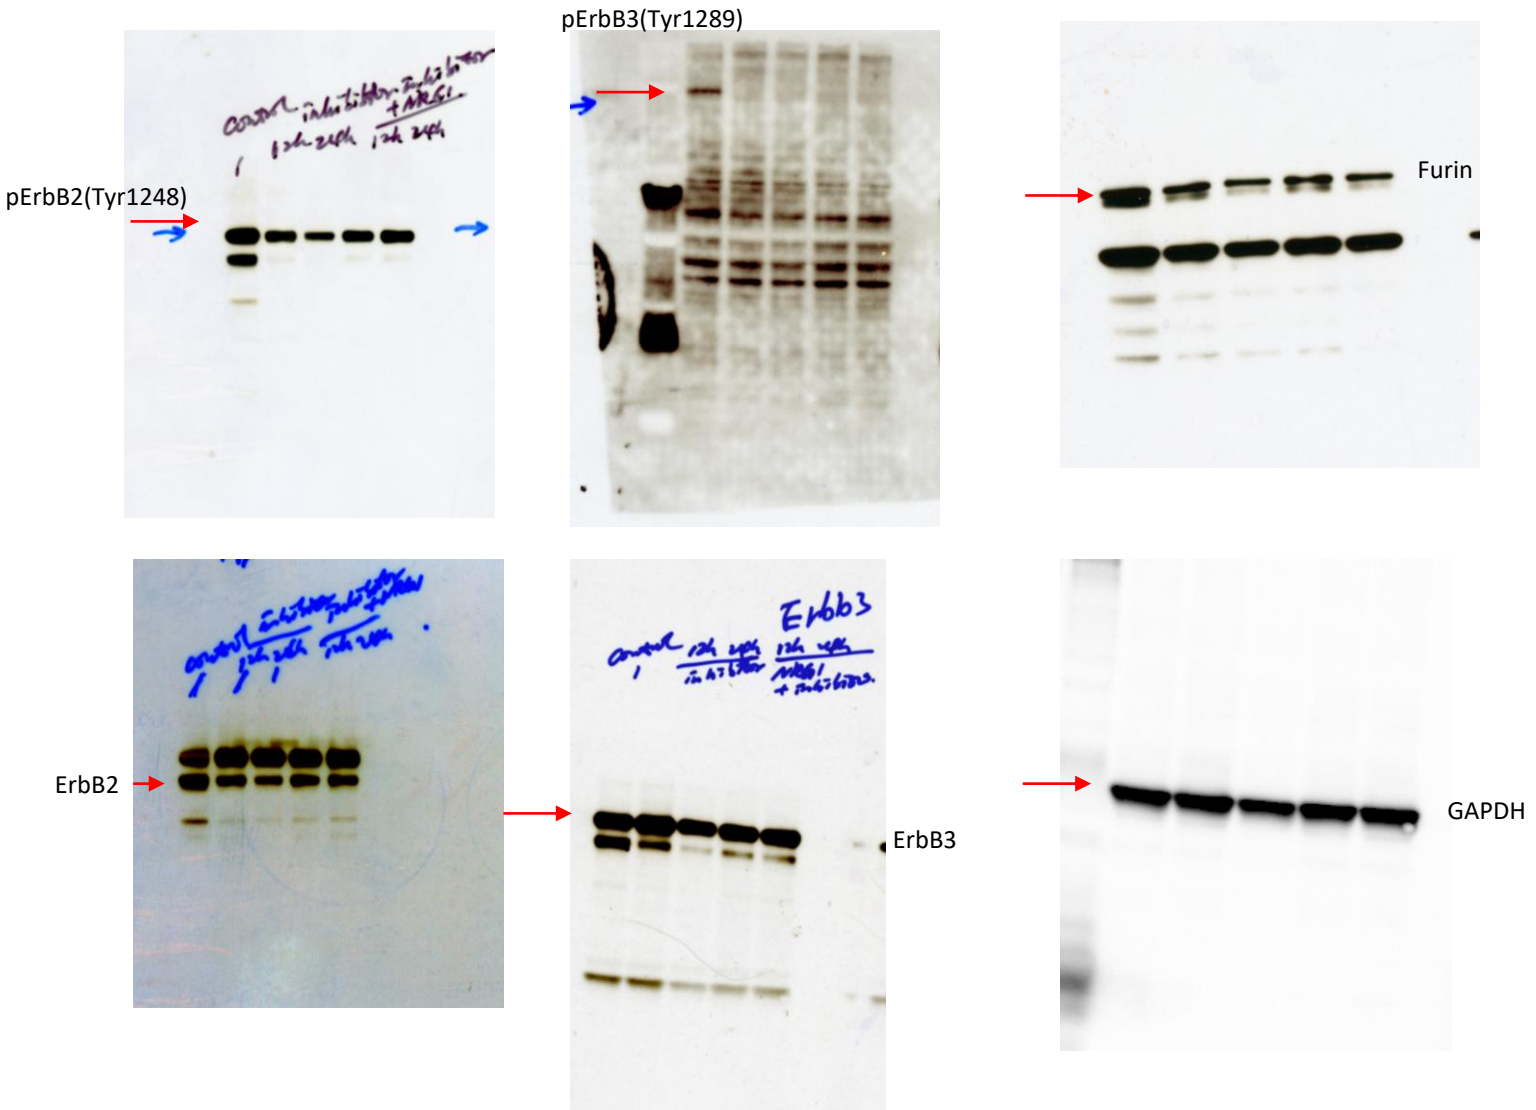

1F

pErbB2(Tyr1248)

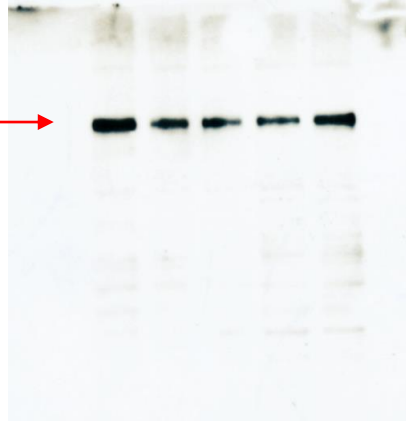

pErbB3(Tyr1289)

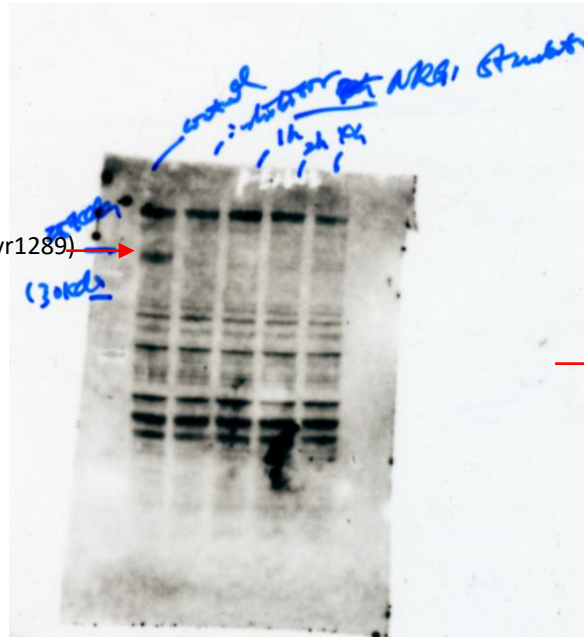

Furin

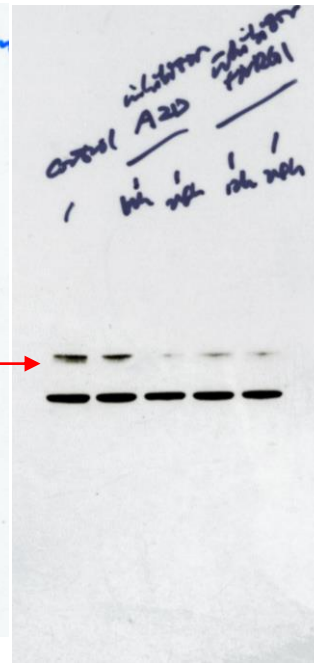

Furin

ErbB2

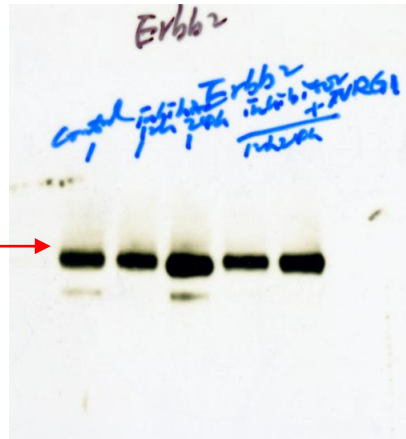

ErbB3

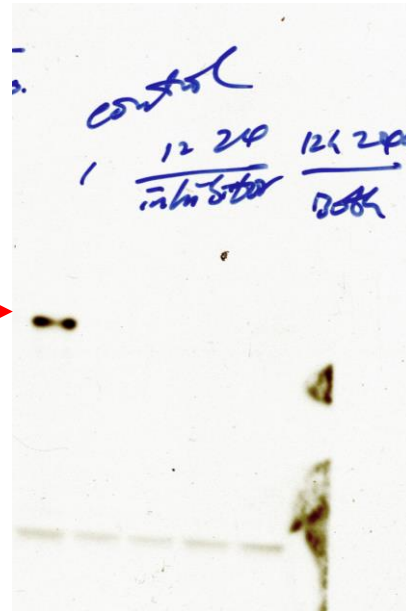

GAPDH

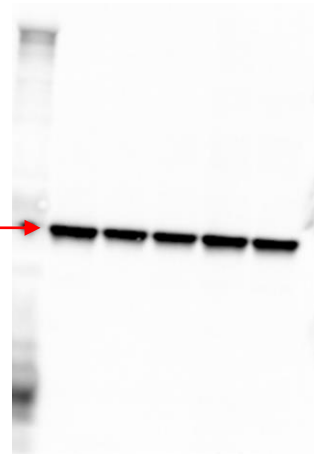

GAPDH

Fig 2A

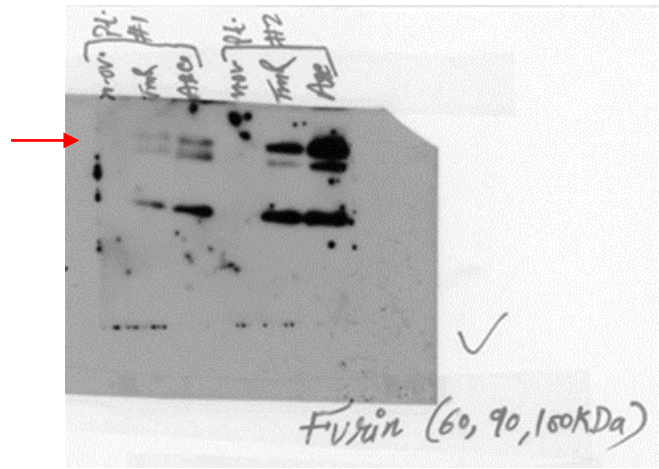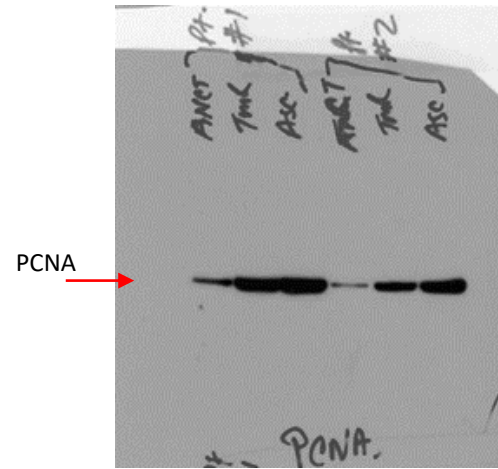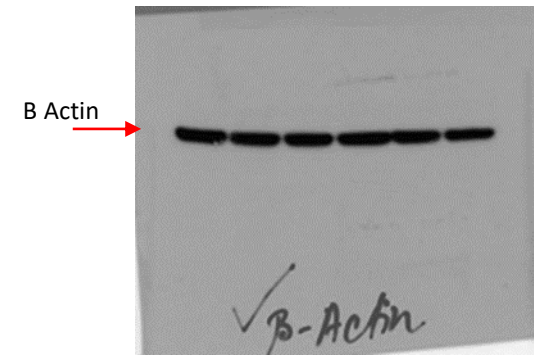

Fig 2B

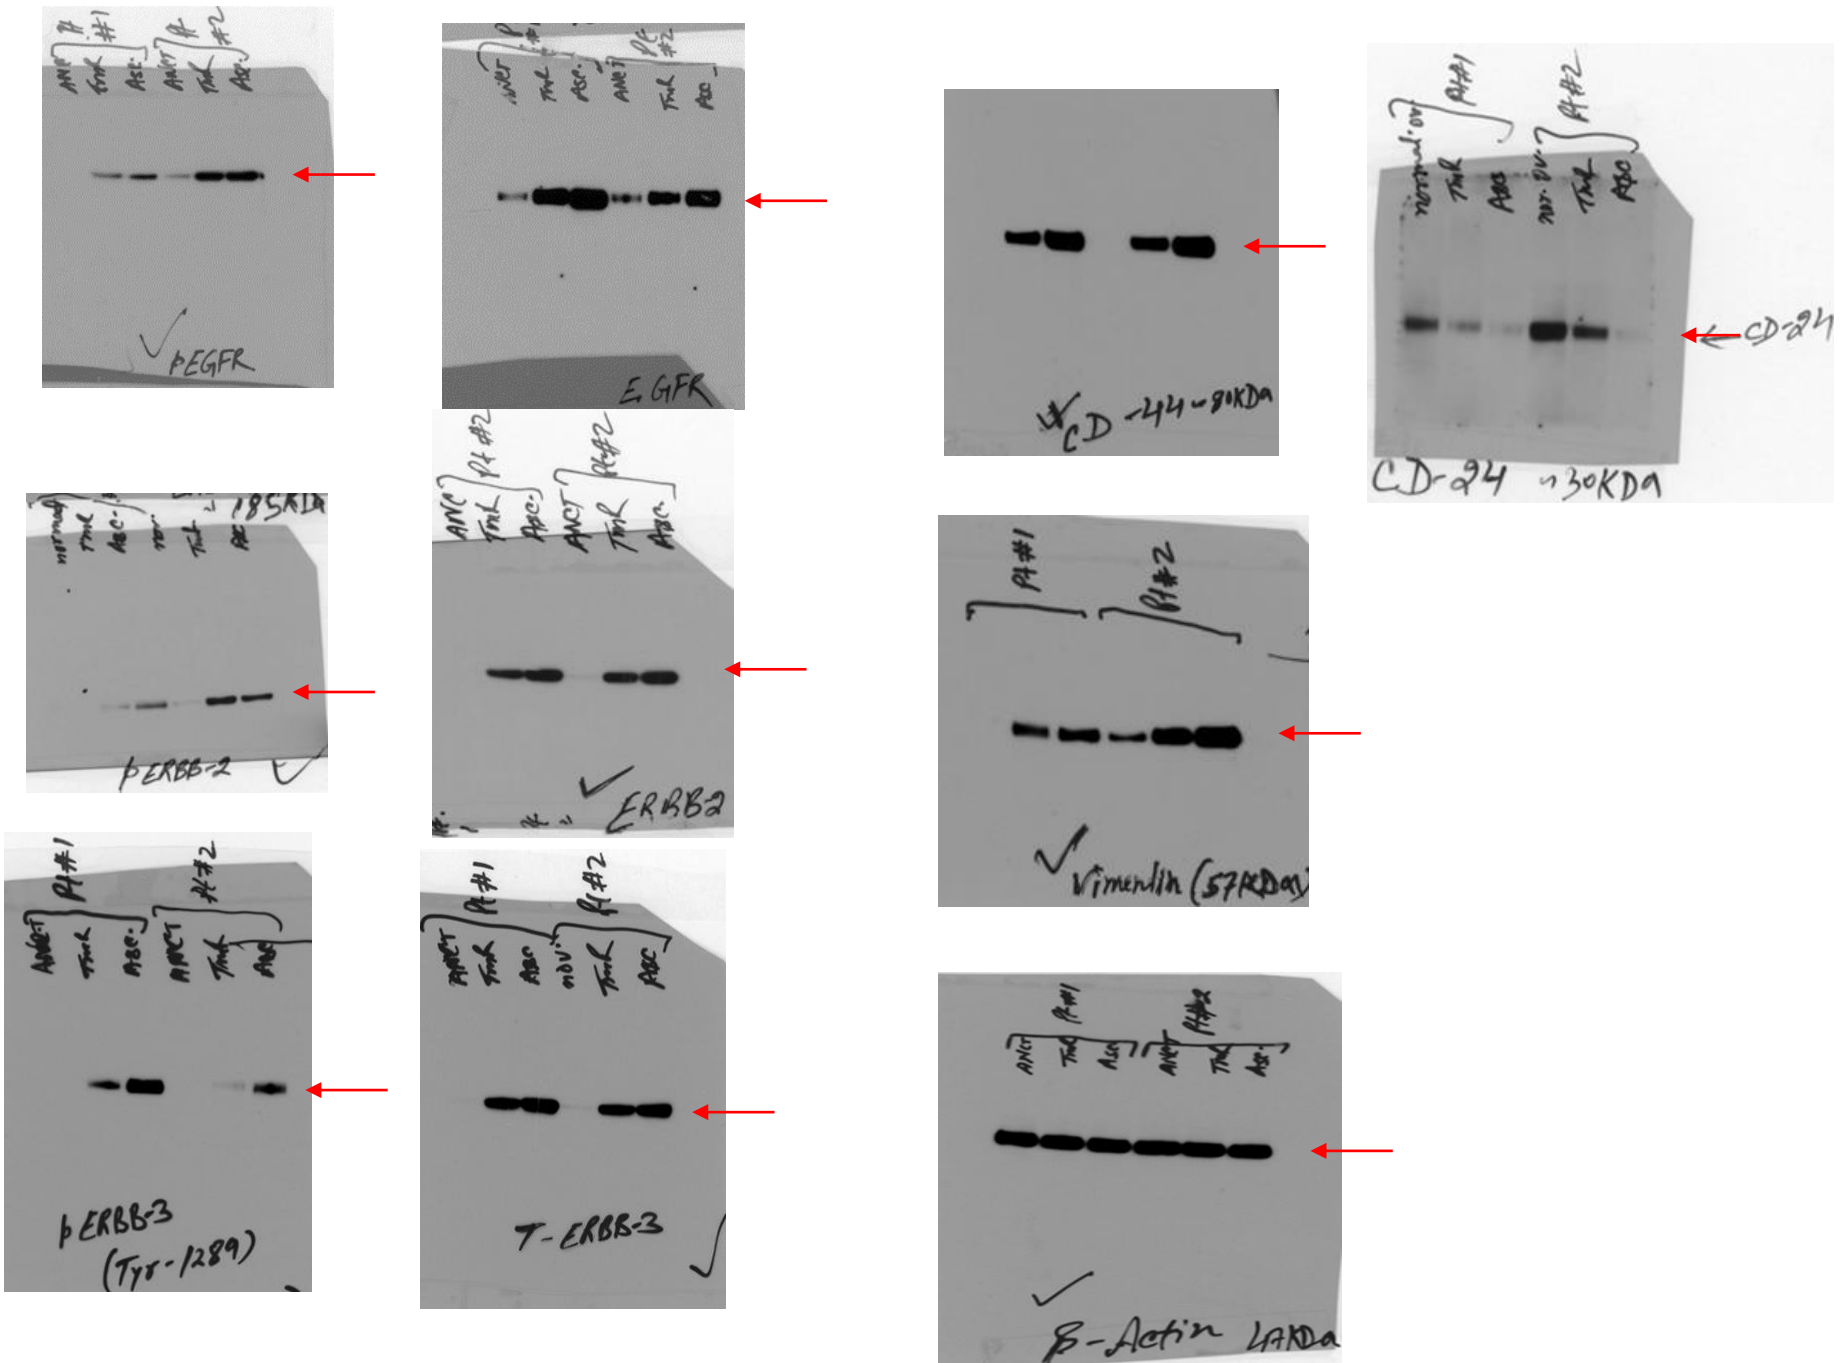

Fig 3

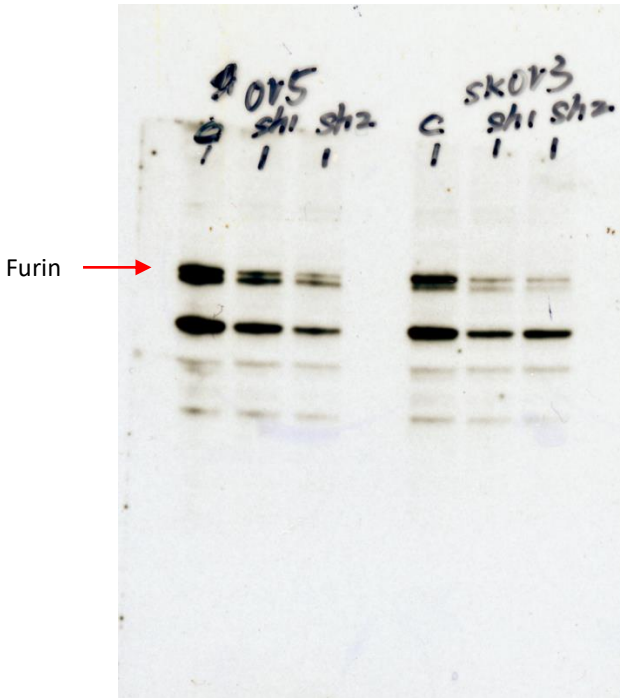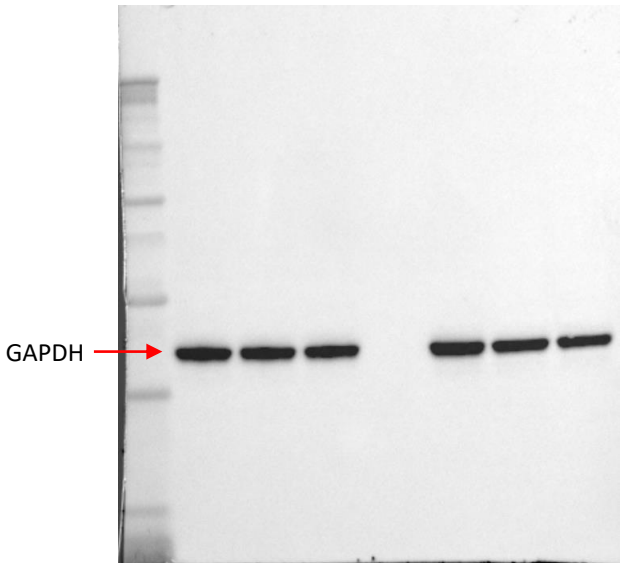

Fig 4

4A

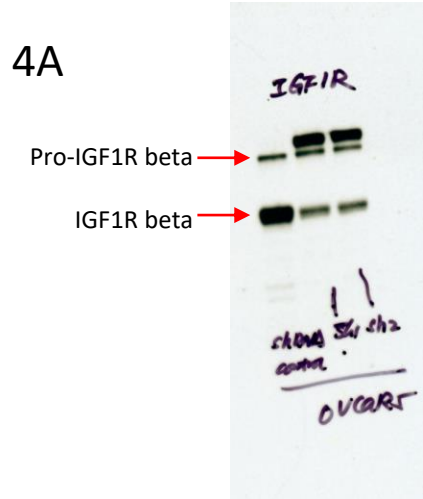

4A

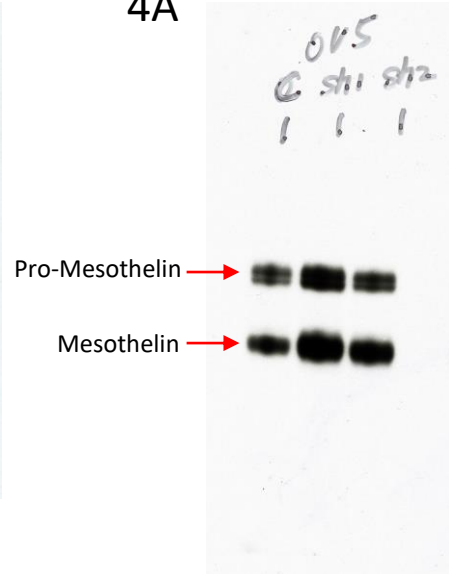

4B

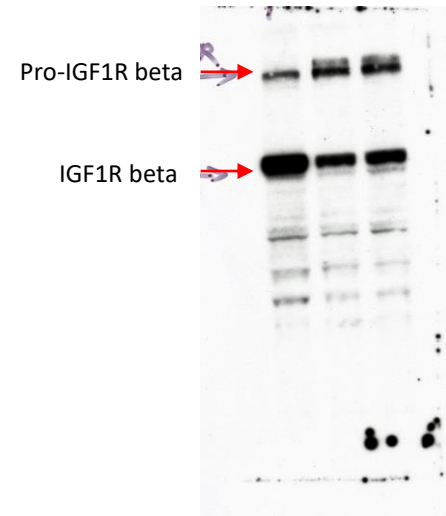

4B

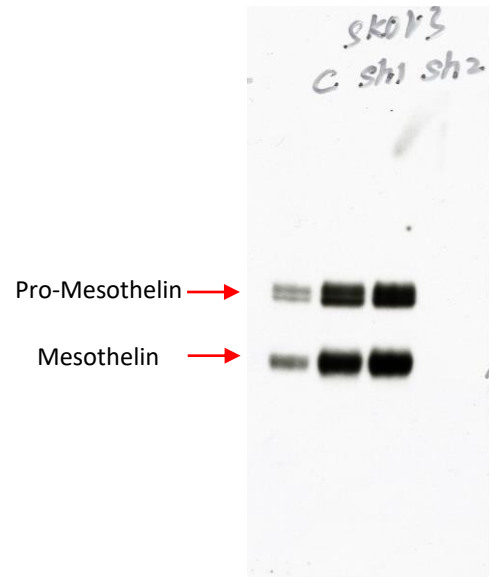

4A

4B

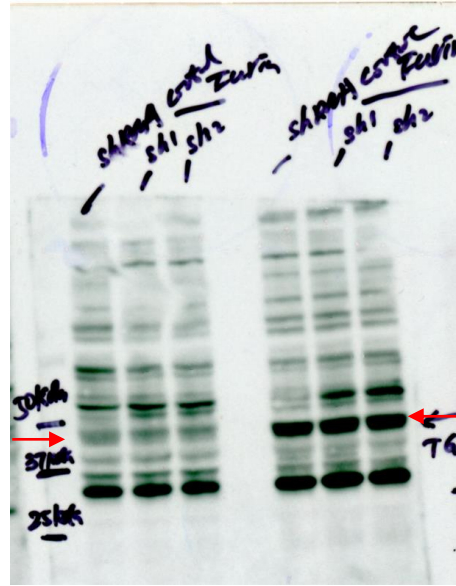

4A

4B

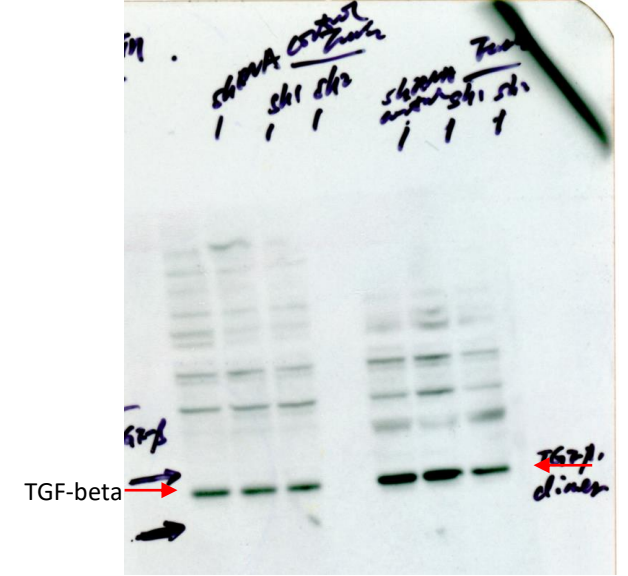

4A

4B

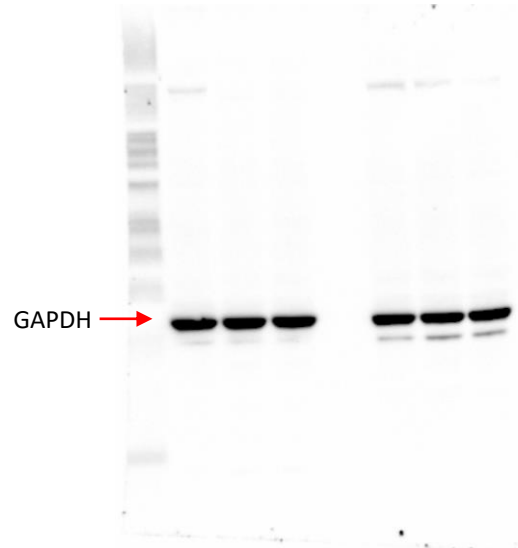



Fig4D

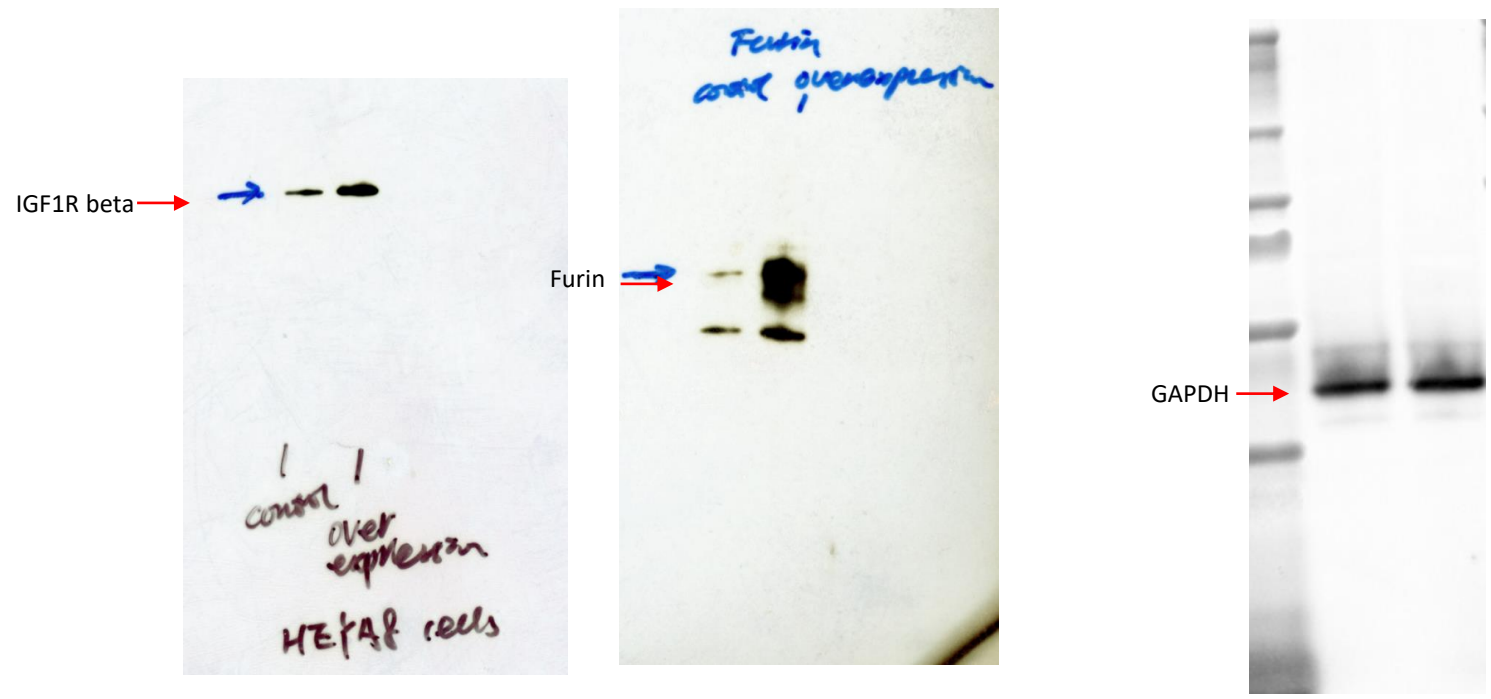

Fig.4E

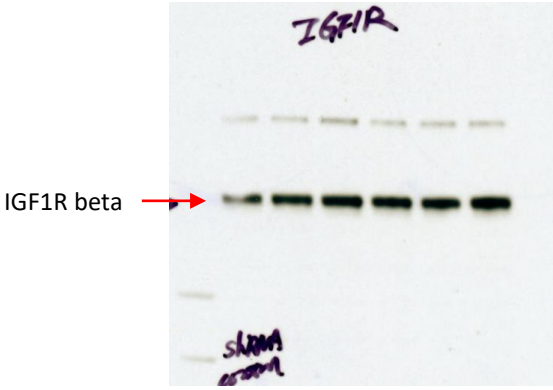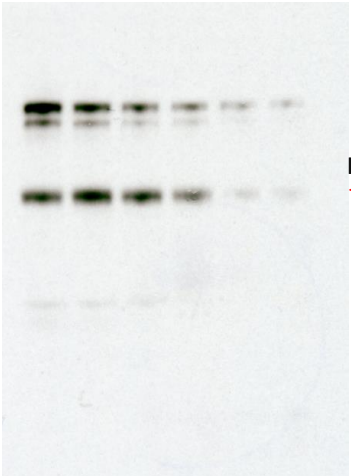

Fig. 4F

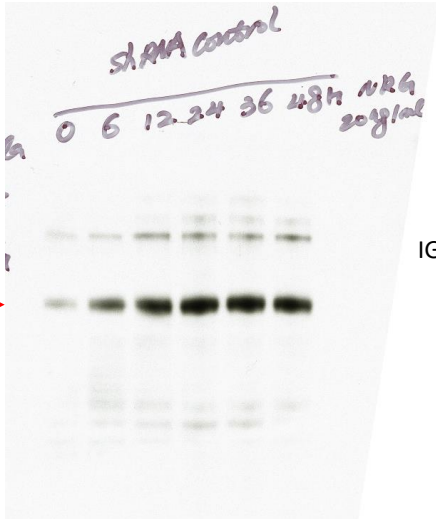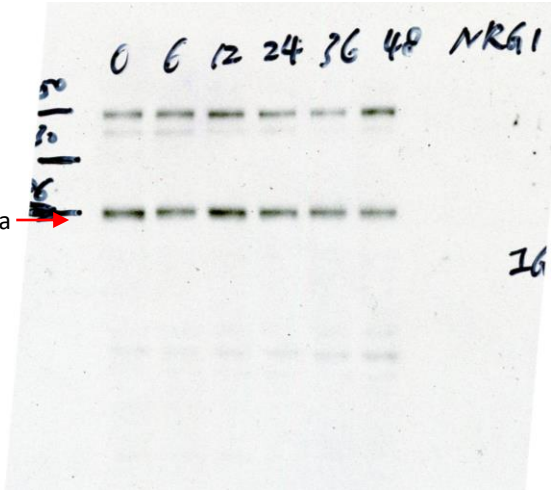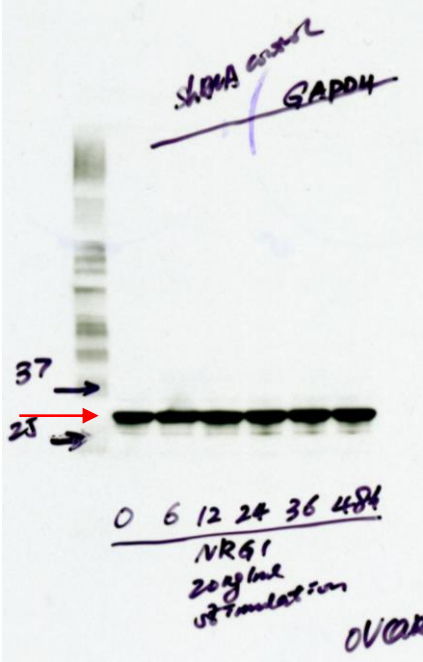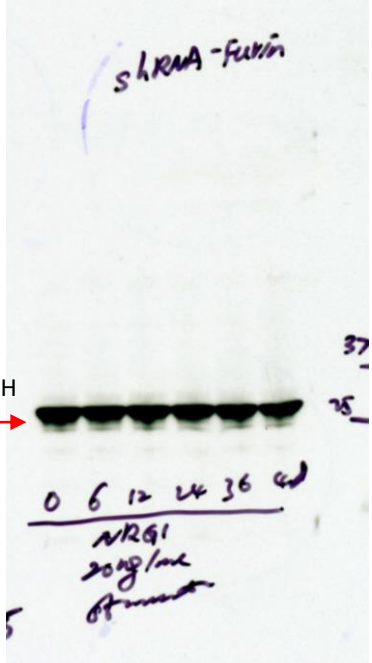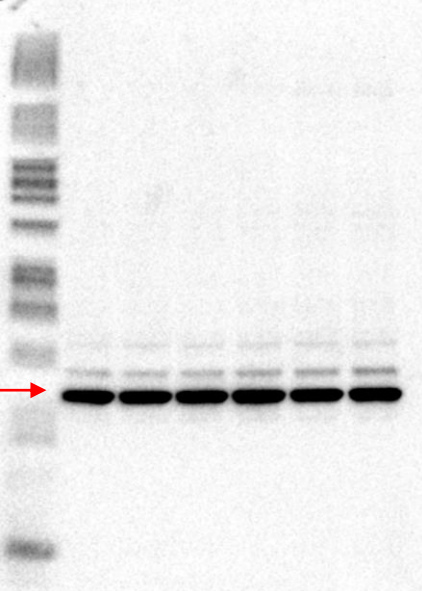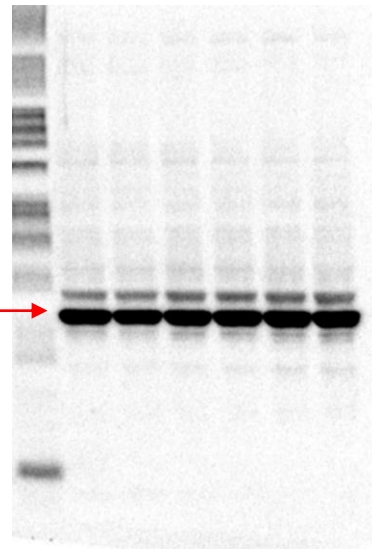

GAPDH

GAPDH

GAPDH

GAPDH

Fig5

A

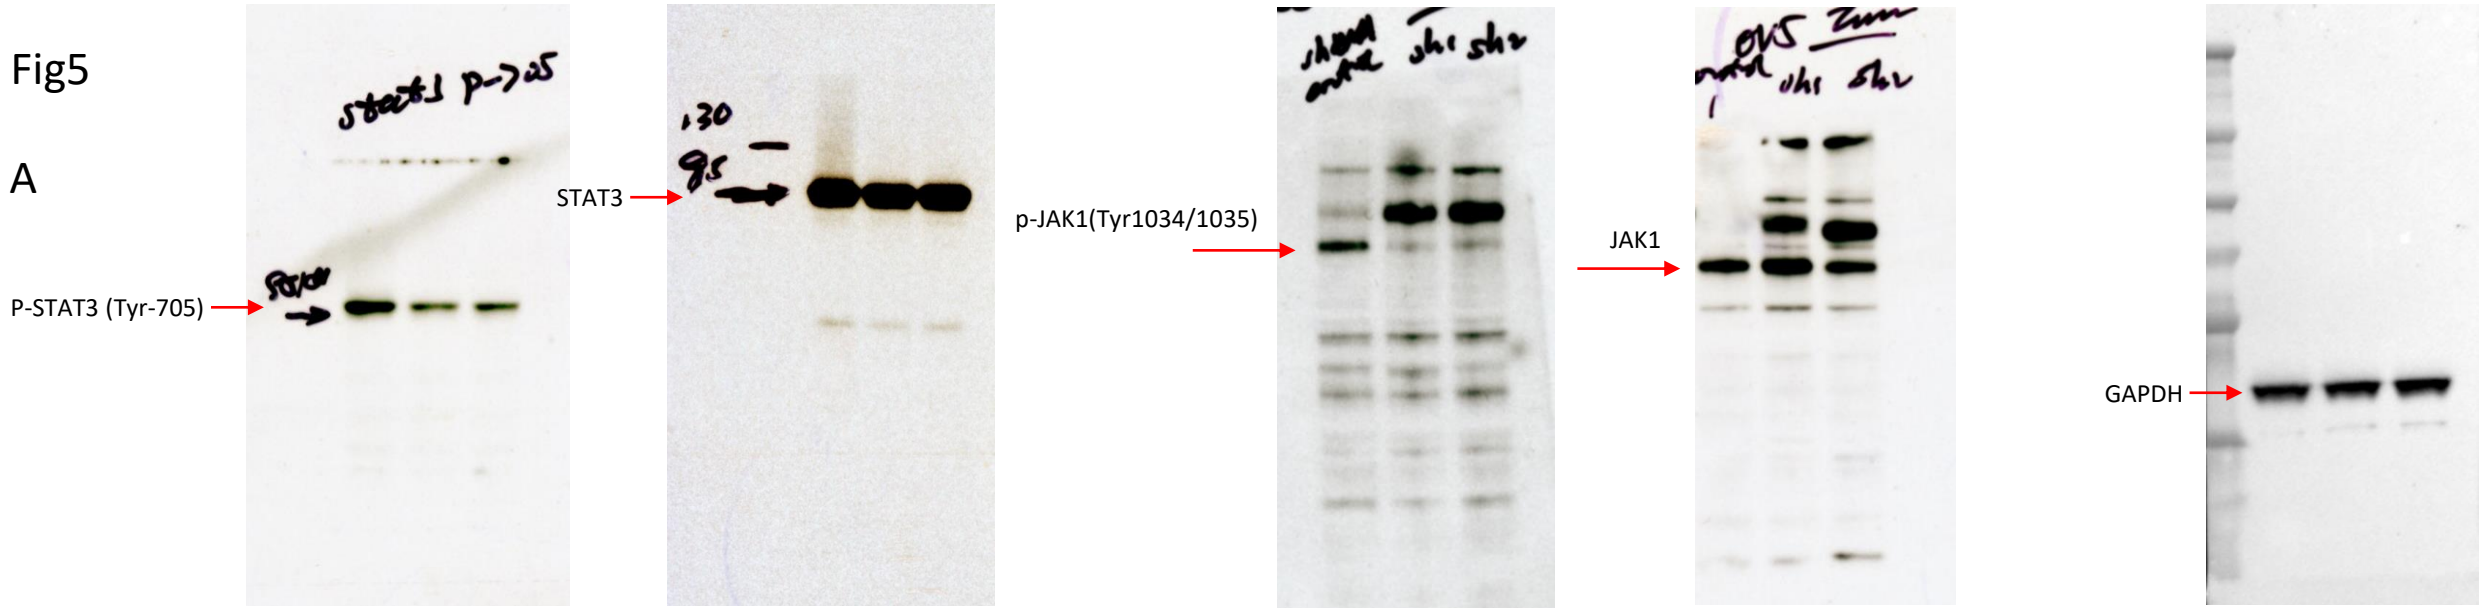

B

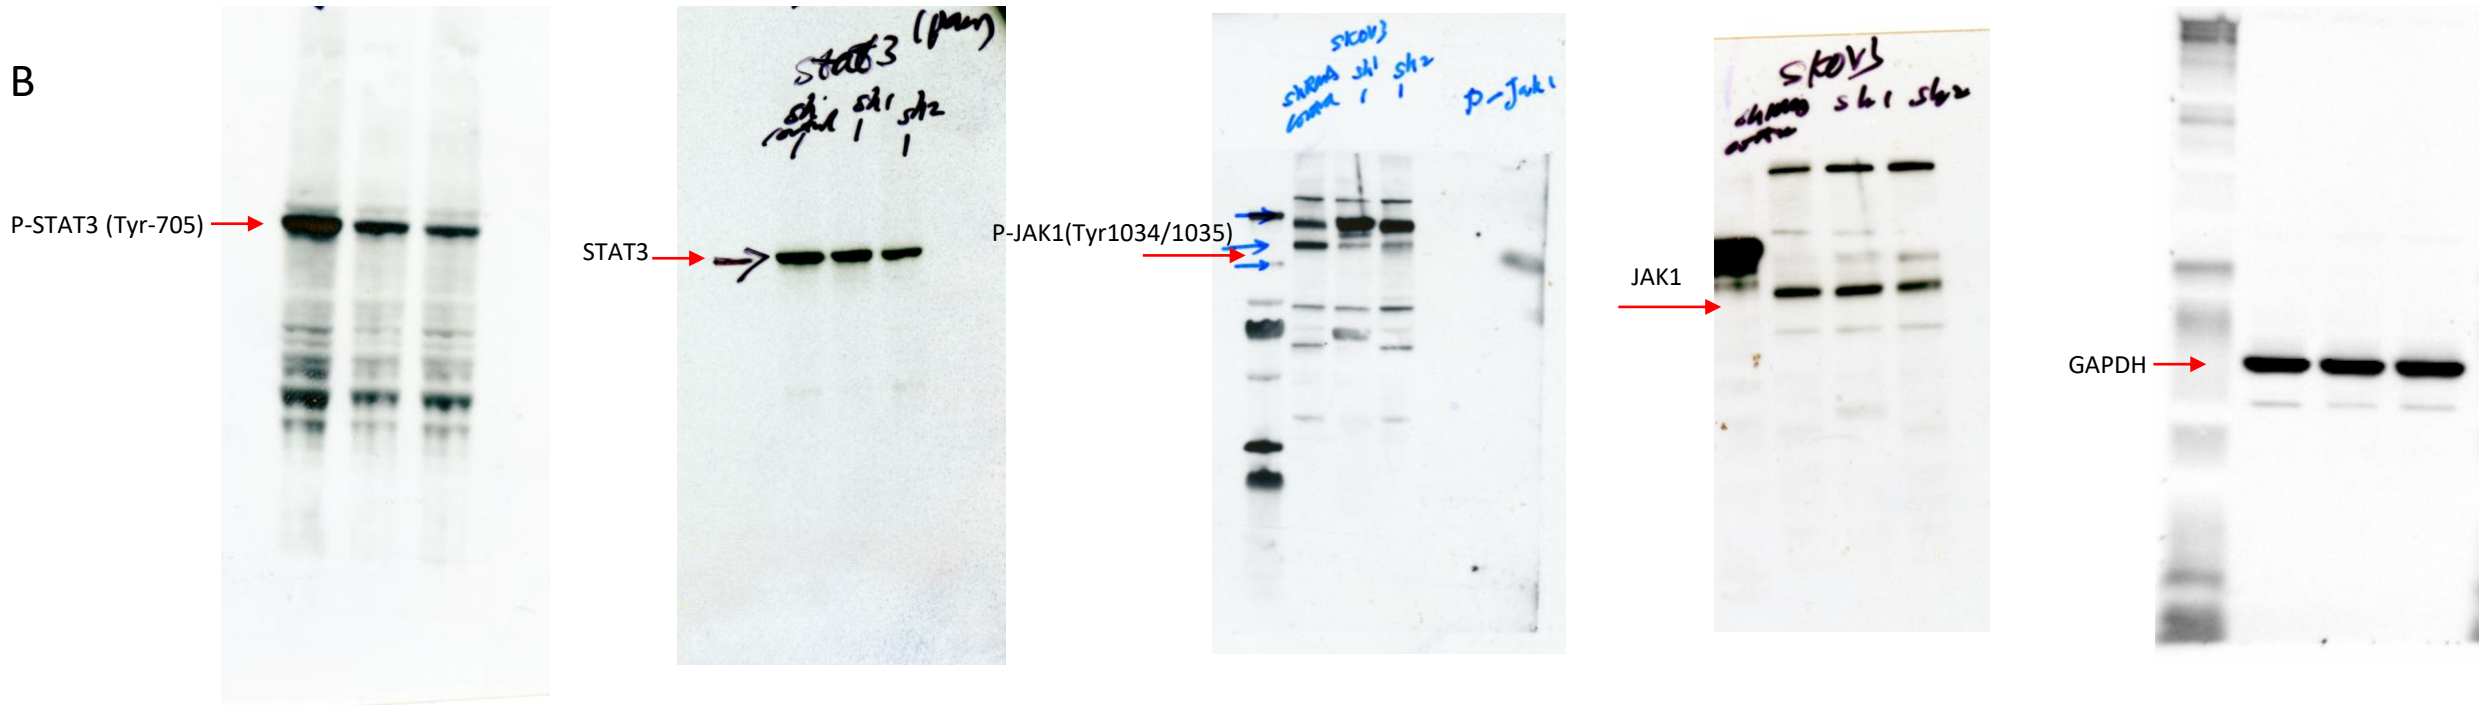

Fig5C

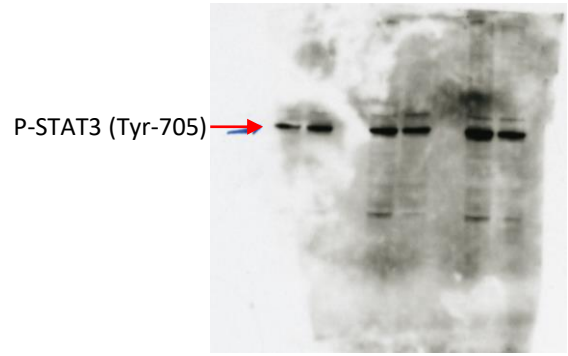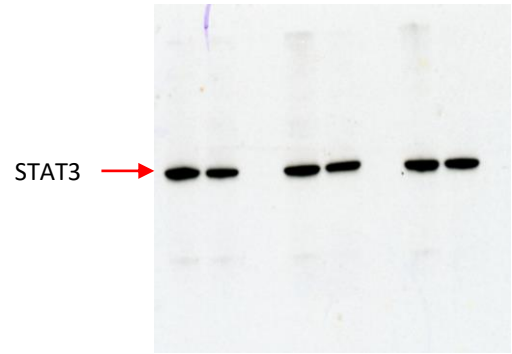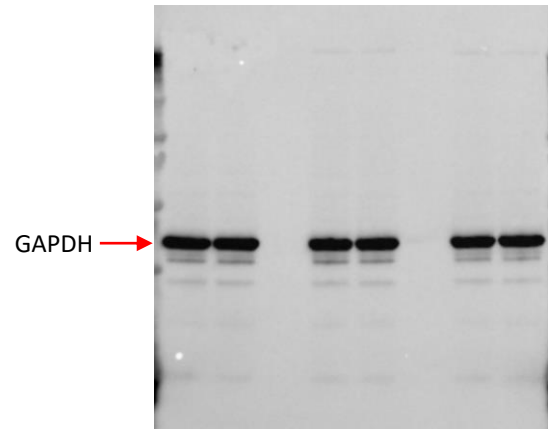

D

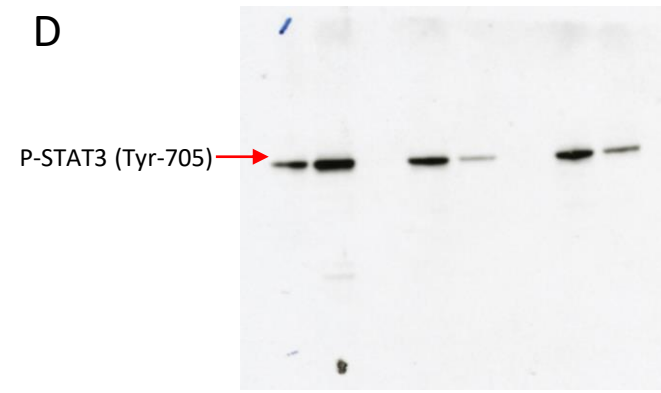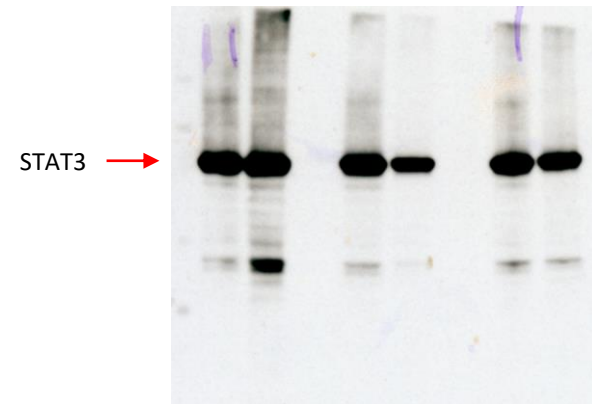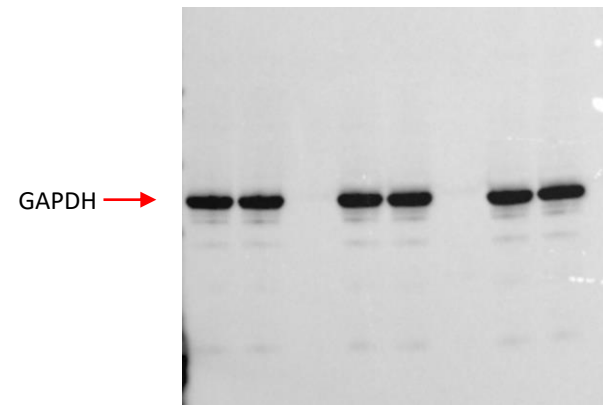

Fig6

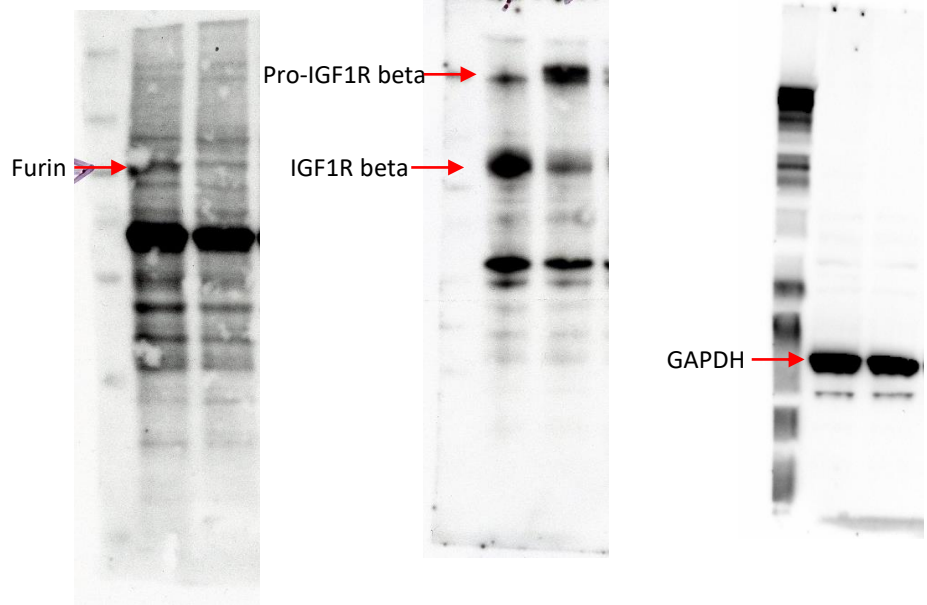

# Supplementary Fig. 5A

p-JAK2 (Tyr1008)

shRNA Control  
shRNA Furin 1  
shRNA Furin 2

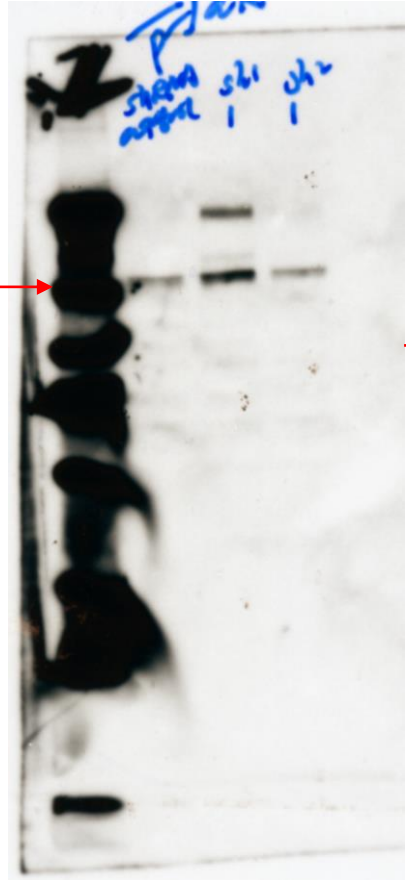

JAK2

shRNA Control  
shRNA Furin 1  
shRNA Furin 2

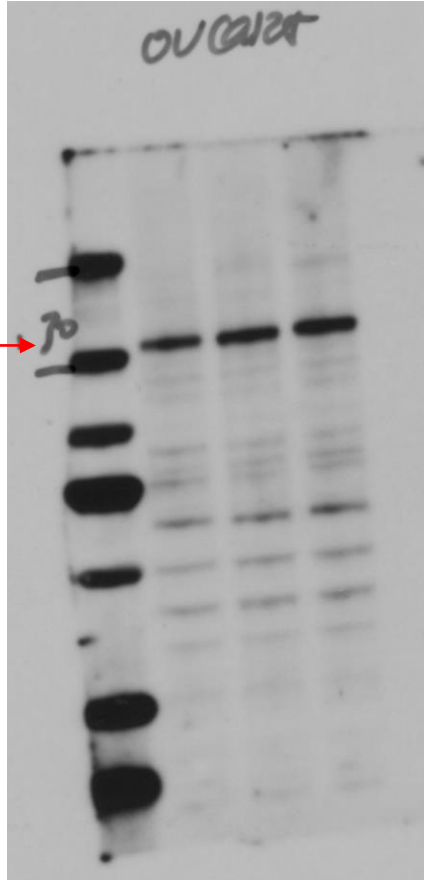

p-TYK2(Tyr1054/2055)

shRNA Control  
shRNA Furin 1  
shRNA Furin 2

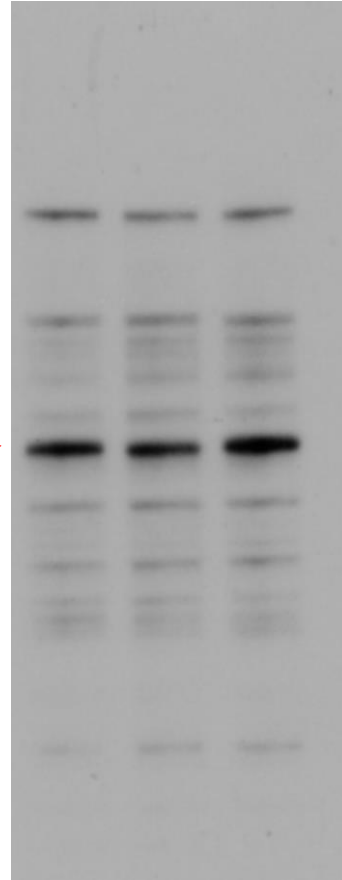

TYK2

shRNA Control  
shRNA Furin 1  
shRNA Furin 2

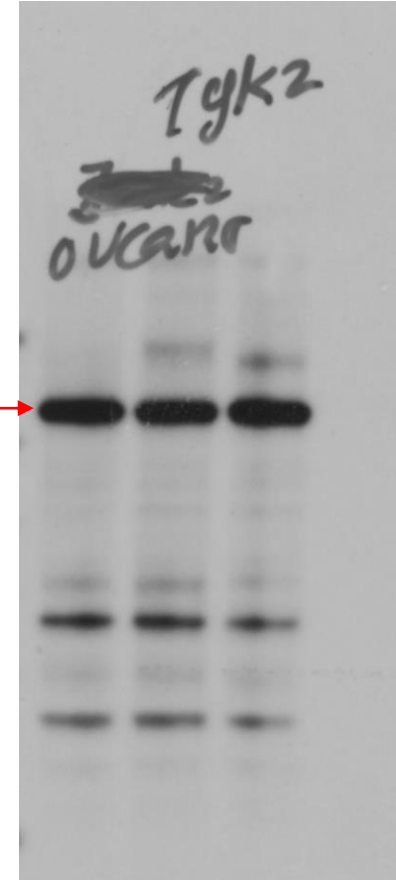

GAPDH

shRNA Control  
shRNA Furin 1  
shRNA Furin 2

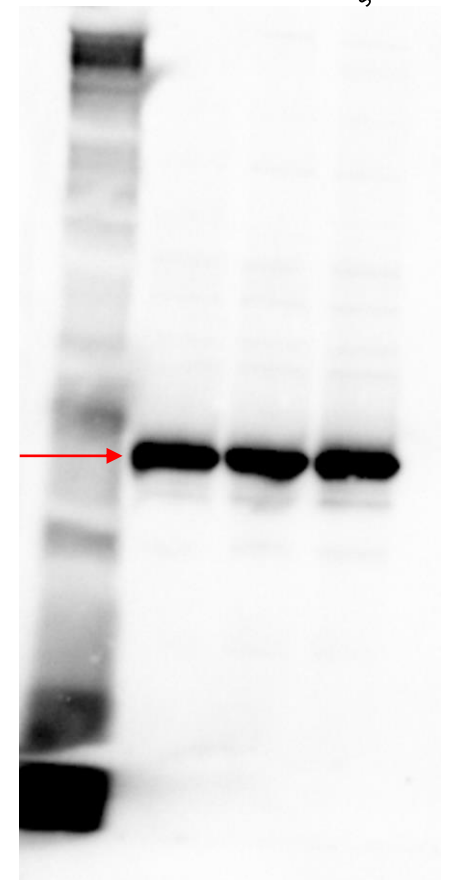

Supplementary Fig. 5B

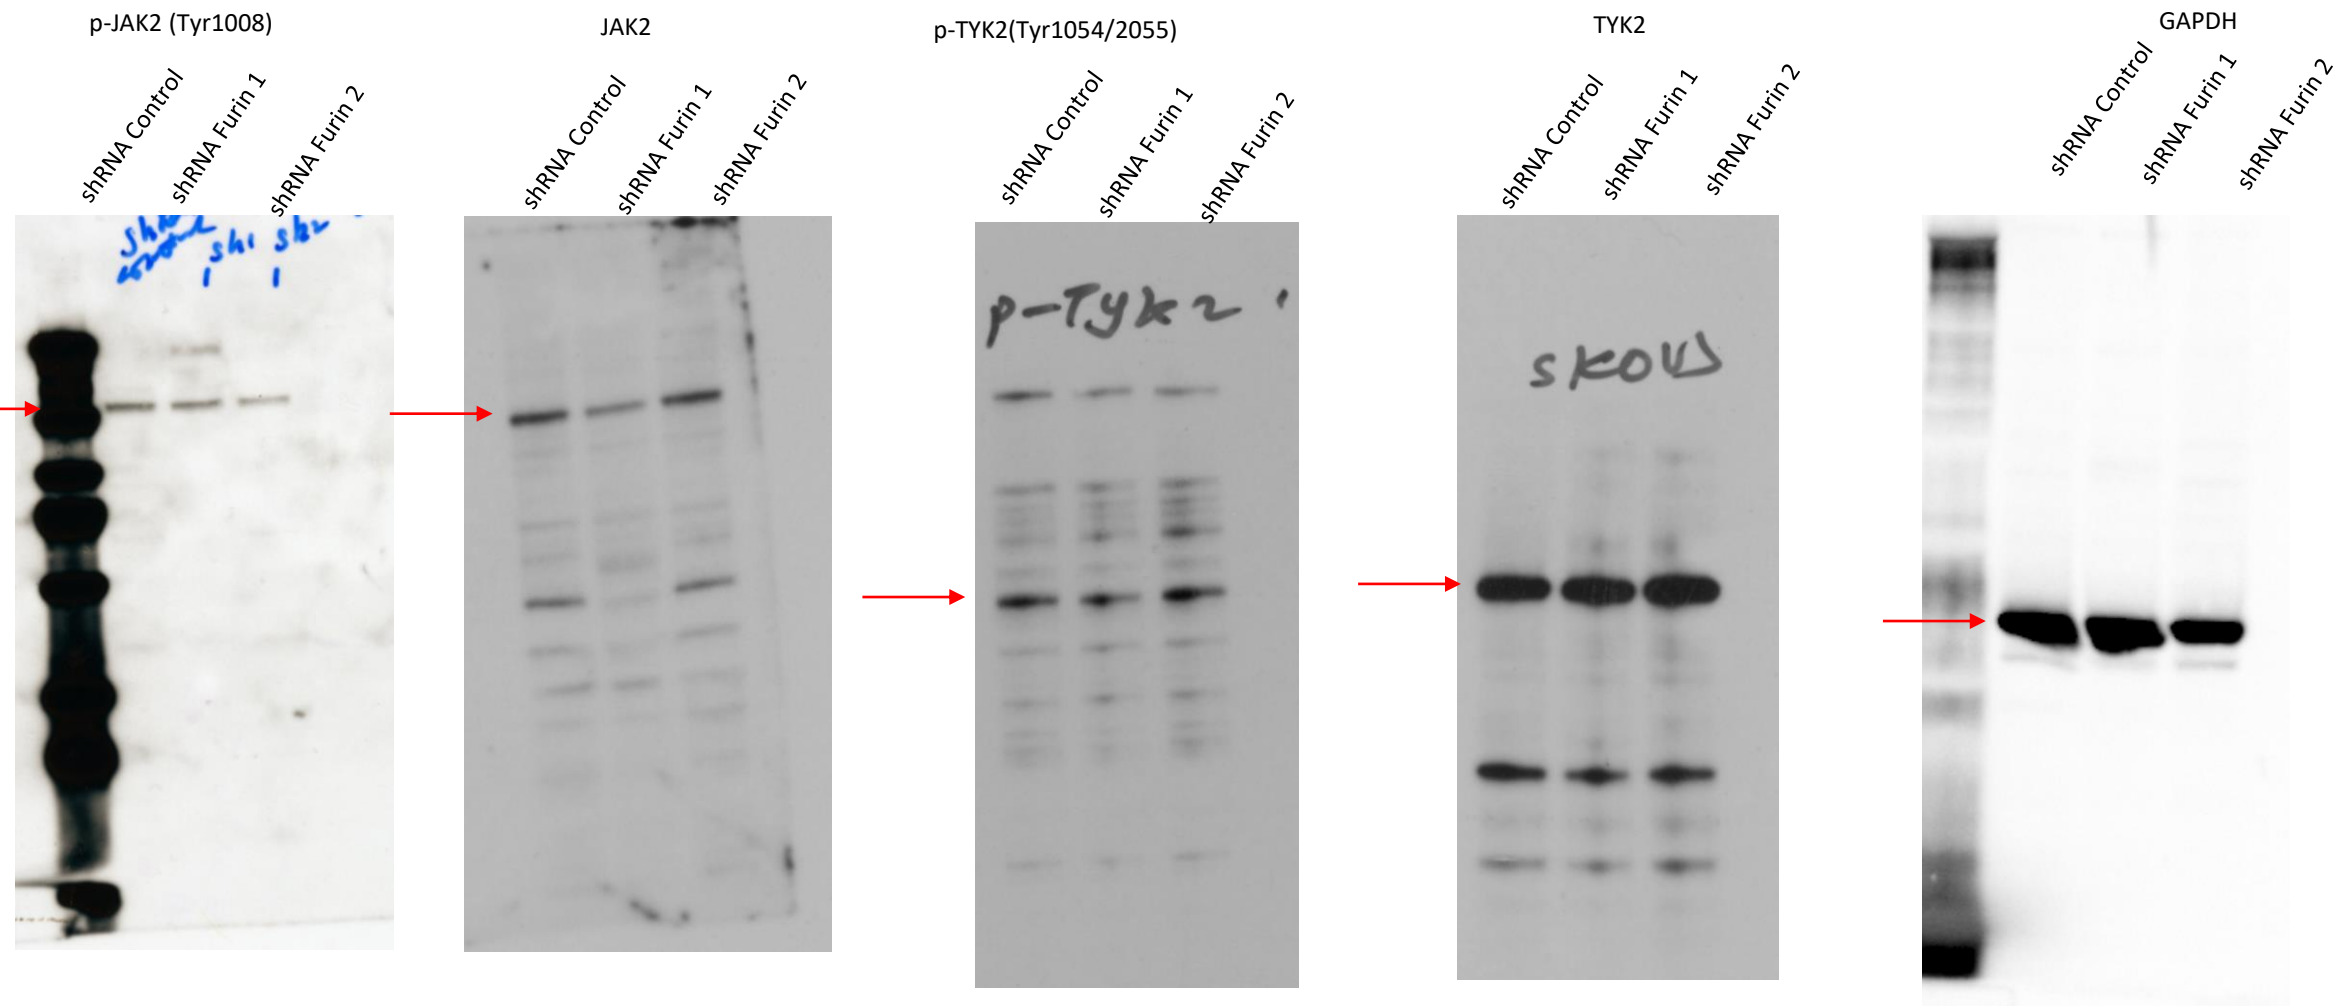

Supplement: NIHMS1552030-supplement-2.pdf [file NIHMS1552030-supplement-2.pdf]
